# Supplementary material
Source: Research Square preprint supplement (doi:10.21203/rs.3.rs-9193825/v1)
Supplement: Supplementary file 1 [file 5e02b557d1815e8706d49a15.docx]

**Table 1: Sociodemographic and clinical characteristics of participants (N = 445)**

| Characteristics (N = 445) | Frequency | % (95% CI) |
| --- | --- | --- |
| Socio-demographic Characteristics |  |  |
| Age (Mean = 33.2 years, SD = 9.91) |  |  |
| Age Group |  |  |
| Young adults (18–24) | 89 | 20.0 (16.5–24.0) |
| Early adulthood (25–34) | 192 | 43.1 (38.6–47.8) |
| Midlife adulthood (35–44) | 104 | 23.4 (19.7–27.5) |
| Late adulthood (≥45) | 60 | 13.5 (10.6–17.0) |
| Gender |  |  |
| Female | 79 | 17.8 (14.5–21.6) |
| Male | 366 | 82.2 (78.4–85.5) |
| Marital Status |  |  |
| Single/never married | 253 | 56.8 (52.1–61.5) |
| Married/cohabiting | 124 | 27.9 (23.7–32.3) |
| Divorced/separated/widowed | 68 | 15.3 (12.1–19.0) |
| Employment Status |  |  |
| Unemployed | 135 | 30.3(26.2–34.8) |
| Pupil/student | 44 | 9.9 (7.4–13.0) |
| Casual labourers | 110 | 24.7 (20.9–28.9) |
| Self-employed | 95 | 21.3 (17.8–25.4) |
| Official employment | 61 | 13.7 (10.8–17.2) |
| Education level |  |  |
| No formal school | 26 | 5.8 (4.0 –8.4) |
| Primary | 160 | 36.0 (31.6–40.5) |
| Secondary | 96 | 21.6 (18.3–25.6) |
| Tertiary | 163 | 36.6 (32.3–41.2) |
| Religion |  |  |
| Anglican/protestant | 154 | 34.6 (30.3–39.1) |
| Catholic | 178 | 40 (35.6–44.6) |
| Muslim | 63 | 14.2 (11.2–17.7) |
| Pentecostal | 38 | 8.5 (6.3–11.5) |
| Others | 12 | 2.7 (1.5–4.7) |
| Residence |  |  |
| Rural | 92 | 20.7 (17.2–24.7) |
| Semi-urban | 129 | 29 (25.0–33.4) |
| Urban | 224 | 50.3 (45.7–55.1) |
| Stable housing |  |  |
| No | 66 | 14.8 (11.8–18.4) |
| Yes | 379 | 85.2 (81.6–88.2) |
| Substance Use and Clinical Characteristics |  |  |
| Primary Substance Used |  |  |
| Alcohol | 265 | 59.6 (55.1–64.0) |
| Cannabis | 87 | 19.6 (15.9–23.3) |
| Sedative-hypnotics | 31 | 7.0 (4.7–9.4) |
| Illegal opioids | 29 | 6.5 (4.3–9.0) |
| Legal opioids (e.g., pethidine, tramadol) | 23 | 5.2 (3.1–7.4) |
| Cocaine/Crack cocaine | 6 | 1.3 (0.4–2.5) |
| Khat (Mairungi) | 2 | 0.4 (0.01–1.6) |
| Anticholinergic | 2 | 0.4 (0.01–1.6) |
| Ever Injected Drugs |  |  |
| Ever injected | 62 | 13.9 (11.0–17.5) |
| Never injected | 383 | 86.1 (82.5–89) |
| Previously treated for SUD |  |  |
| No | 225 | 50.6 (45.8–55.3) |
| Yes | 220 | 49.4 (44.7–54.2) |
| Acute psychosis at treatment entry |  |  |
| Not psychotic | 307 | 69 (64.5–73.1) |
| Psychotic | 138 | 31 (26.9–35.5) |
| ADHD Screen (ASRS-v1.1) |  |  |
| Negative | 403 | 90.6 (87.9–93.3) |
| Positive | 42 | 9.4 (6.7–12.1) |
| Depression Screen (DASS-21) |  |  |
| Negative | 131 | 29.4 (25.4–33.8) |
| Positive | 314 | 70.6 (66.2–74.6) |
| Anxiety Screen (DASS-21) |  |  |
| Negative | 214 | 48.1 (43.5–52.7) |
| Positive | 231 | 51.9 (47.3–56.5) |
| Stress Screen (DASS-21) |  |  |
| Negative | 305 | 68.5 (64.1–72.7) |
| Positive | 140 | 31.5 (27.3–35.9) |
| WHODAS Disability Categories |  |  |
| No disability | 64 | 14.4 (11.4–17.9) |
| Mild disability | 222 | 49.9 (45.3–54.5) |
| Moderate disability | 127 | 28.5 (24.5–32.9) |
| Severe disability | 32 | 7.19 (5.1–9.9) |
| Quality of Life (WHOQOL-BREF) |  |  |
| Physical Health (Mean = 58.6, SD = 17.2) |  |  |
| Psychological (Mean = 57.8, SD = 18.2) |  |  |
| Social relationships (Mean = 57.5, SD = 23.5) |  |  |
| Environment (Mean = 51.7, SD = 17.7) |  |  |
| Overall QoL (Mean = 59.0, SD = 21.5) |  |  |
| Global Quality of Life (WHOQOL-BREF) |  |  |
| Good | 195 | 43.8 (39.3–48.5) |
| Not good | 250 | 56.2 (51.5–60.7) |

**Table 2: Model selection indices for latent class analysis**

| Classes | Log-likelihood | AIC | BIC | Smallest class (n) | Smallest class (%) | Entropy | ALCPP |
| --- | --- | --- | --- | --- | --- | --- | --- |
| 1-class | −2312.9 | 4641.8 | 4682.6 | 451 | 100 | — | — |
| 2-class | −2023.7 | 4063.4 | 4131.9 | 128 | 28.7 | 0.82 | 0.896 |
| 3-class | −1921.6 | 3867.2 | 3968.9 | 49 | 11.0 | 0.88 | 0.909 |
| 4-class* | **−1856.4** | **3744.8** | **3879.8** | **38** | **8.5** | **0.92** | **0.914** |
| 5-class | −1840.1 | 3720.2 | 3888.5 | 24 | 5.3 | 0.89 | 0.747 |
| 6-class | −1832.7 | 3713.4 | 3914.9 | 17 | 3.8 | 0.86 | 0.749 |
| *AIC = Akaike Information Criterion; BIC = Bayesian Information Criterion; ALCPP = Average Latent Class Posterior Probability. The four-class solution comprised the alcohol-dominant (ALC-dom), cannabis–alcohol (CAN-ALC), prescription drug (PRES), and high-risk illicit (HR-ILL) profiles. The five- and six-class solutions are retained in Table 2 for transparency but were not interpreted further.* | | | | | | | |

**Table 3: Bivariate multinomial regression with latent class membership**

| Predictor | Likelihood Ratio  Chi-square test value | df | p_value |
| --- | --- | --- | --- |
| Injection drug use | 114.0 | 3 | <0.0001 |
| Age group | 128.9 | 9 | <0.0001 |
| Marital status | 72.3 | 9 | <0.0001 |
| Employment status | 66.0 | 12 | <0.0001 |
| Religion | 45.8 | 12 | <0.0001 |
| Area of residence | 32.9 | 6 | <0.0001 |
| Gender | 21.7 | 3 | <0.0001 |
| Education level | 30.8 | 9 | 0.0003 |
| Housing stability | 17.9 | 3 | 0.0005 |
| Acute psychosis at treatment entry | 15.2 | 3 | 0.002 |
| PTSD (PC-PTSD-5) | 14.1 | 3 | 0.003 |
| Disability (WHODAS 2.0) | 9.7 | 3 | 0.02 |
| Depression (DASS-21) | 6.7 | 3 | 0.08 |
| Previously treated for SUD | 4.8 | 3 | 0.18 |
| Anxiety (DASS-21) | 3.0 | 3 | 0.40 |
| Stress (DASS-21) | 2.3 | 3 | 0.51 |
| Quality of life (WHOQOL-BREF) | 1.5 | 3 | 0.69 |
| ADHD (ASRS-v1.1) | 1.2 | 3 | 0.76 |
