# Supplementary material
Source: Research Square preprint supplement (doi:10.21203/rs.3.rs-9193825/v1)
Supplement: Supplementary file 1 [file 5408a163269e5fdcfa32cc88.xlsx]

## Sheet: Sheet1
Table 4:Adjusted covariates of latent class membership: multivariable and ridge-penalised estimates (reference: ALC-dom)
Predictor	CAN-ALC aRRR (95% CI)	CAN-ALC Penalized aRRR (β)	PRES aRRR (95% CI)	PRES Penalized aRRR (β)	HR-ILL aRRR (95% CI)	HR-ILL Penalized aRRR (β)
Age group
Late adulthood (≥45)	Ref	Ref	Ref	Ref	Ref	Ref
Midlife adulthood (35–44)	10.89 (1.31–90.31)	0.73 (-0.32)	4.55 (1–20.76)	1.21 (0.19)	0.62 (0.07–5.74)	0.91 (-0.09)
Early adulthood (25–34)	38.88 (4.99–302.58)	1.59 (0.47)	2.1 (0.45–9.74)	0.99 (-0.01)	3.44 (0.48–24.85)	1.53 (0.42)
Young adults (18–24)	354.96 (38.98–3232.3)	4.58 (1.52)	37.46 (5.94–236.2)	2.67 (0.98)	2.09 (0.13–33.4)	1.74 (0.56)
Gender
Female	Ref	Ref	Ref	Ref	Ref	Ref
Male	4.2 (1.73 –14.82)	1.84 (0.61)	0.56 (0.22–1.44)	0.83 (-0.18)	0.89 (0.23 – 3.5)	1.01 (0.01)
Marital status
Single/never married	Ref	Ref	Ref	Ref	Ref	Ref
Married/cohabiting	1.54 (0.11-6.03)	1.48(0.39)	0.86 (0.05-3.26)	0.80 (-0.23)	0.44 (0.01-1.69)	0.61(-0.49)
Divorced/separated/widowed	2.04 (0.99-72.5)	1.57(0.45)	1.45 (0.47-51.4)	1.02 (0.02)	0.80 (0.10-15.8)	0.93(-0.07)
Residence
Rural	Ref	Ref	Ref	Ref	Ref	Ref
Semi-urban	1.43 (0.62–3.27)	1.01 (0.01)	10.8 (2.08–55.9)	1.36 (0.31)	62.1 (3.02 – 1278.8)	1.08 (0.07)
Urban	2.22 (1.01– 4.89)	1.39 (0.33)	7.73 (1.53–39.0)	1.36 (0.31)	89.8 (4.89 – 1648.6)	1.62 (0.48)
Employment
Official employment	Ref	Ref	Ref	Ref	Ref	Ref
Casual labourer	1.95 (0.58–6.57)	0.93 (-0.08)	1.39 (0.25–7.67)	0.87 (-0.14)	12.09 (0.73–201.0)	0.91 (-0.09)
Pupil/student	1.91 (0.49–7.39)	1.49 (0.40)	2.23 (0.36–13.73)	1.66 (0.51)	3.98 (0.13–123.0)	1.07 (0.07)
Self- employed	2.73 (0.91–8.18)	1.03 (0.03)	2.57 (0.58–11.43)	1.01 (0.01)	5.13 (0.29–92.4)	0.86 (-0.15)
Unemployed	5.05 (1.7–15.03)	1.65 (0.50)	1.93 (0.41–9.07)	1.19 (0.17)	50.93 (3.37–770.2)	2.01 (0.70)
Religion
Anglican/protestant	Ref	Ref	Ref	Ref	Ref	Ref
Catholic	0.52 (0.26–1.04)	0.80 (-0.22)	0.86 (0.3–2.48)	0.80 (-0.22)	0.1 (0.02–0.47)	0.65 (-0.43)
Muslim	1.48 (0.59–3.71)	1.50 (0.41)	4.1 (1.16–14.56)	1.84 (0.61)	0.64 (0.14–3.05)	1.80 (0.59)
Pentecostal	1.31 (0.43–3.98)	0.60 (-0.52)	4.17 (1.08–16.1)	1.37 (0.31)	1.37 (0.24–7.73)	0.80 (-0.23)
Others	0.17 (0.02–1.32)	1.48 (0.39)	1.29 (0.18–9.48)	1.98 (0.68)	0.02 (0–0.74)	1.63 (0.49)
Education level
No formal school	Ref	Ref	Ref	Ref	Ref	Ref
Primary	0.64 (0.12–3.28)	1.04 (0.04)	0.13 (0.02–0.93)	0.90 (-0.11)	0.08 (0–1.38)	1.09 (0.09)
Secondary	0.78 (0.13–4.6)	1.11 (0.10)	0.17 (0.02–1.4)	1.07 (0.07)	0.06 (0–1.19)	1.44 (0.36)
Tertiary	0.87 (0.15–5.04)	0.98 (-0.02)	0.25 (0.03–2.01)	1.03 (0.03)	0.01 (0–0.25)	0.72 (-0.34)
Housing stability
Stable housing	Ref	Ref	Ref	Ref	Ref	Ref
No stable housing	2.71 (1.11–6.61)	1.80 (0.59)	1.18 (0.48 – 6.81)	1.33 (0.29)	0.96 (0.18 – 5.26)	1.77 (0.57)
Injection drug use
Never injected	Ref	Ref	Ref	Ref	Ref	Ref
Ever injected	7.84 (2.05–29.9)	1.67 (0.52)	51.21 (12.55–208.9)	4.43 (1.49)	401.61 (62.09–2597.6)	6.66 (1.90)
Mental Status at Presentation
Not psychotic	Ref	Ref	Ref	Ref	Ref	Ref
Psychotic	2.76 (1.43–5.3)	1.60 (0.47)	3.84 (1.57–9.42)	1.56 (0.44)	1.35 (0.37–4.87)	1.44 (0.36)
Previous SUD treatment
No	Ref	Ref	Ref	Ref	Ref	Ref
Yes	1.61 (1.0 – 2.89)	1.13 (0.13)	1.84 (0.81–4.15)	1.31 (0.27)	3.1 (1.0 – 10.6)	1.31 (0.27)
Disability
No	Ref	Ref	Ref	Ref	Ref	Ref
Yes	0.37 (0.16–0.83)	0.64 (-0.44)	0.72 (0.19–2.71)	0.91 (-0.09)	0.16 (0.04–0.67)	0.63 (-0.46)
Depression
No	Ref	Ref	Ref	Ref	Ref	Ref
Yes	0.59 (0.31–1.13)	0.73 (-0.32)	0.51 (0.21–1.27)	0.72 (-0.32)	0.2 (0.06–0.74)	0.80 (-0.23)
PTSD
No	Ref	Ref	Ref	Ref	Ref	Ref
Yes	0.59 (0.3–1.19)	0.72 (-0.32)	0.95 (0.36–2.5)	0.80 (-0.22)	0.39 (0.08–1.82)	0.71 (-0.35)
Ridge-penalized estimates were obtained using L2-regularized multinomial regression. Ridge-penalized aRRR = exp(βridge). Penalization shrinks coefficients toward 0 to improve stability under sparse data
